# Supplementary material for: Exploring the effect of maternal autoimmune diseases on behavioral and social difficulties risk in children born preterm: evidence from EPIPAGE-2 study
Source: Research Square preprint supplement (doi:10.21203/rs.3.rs-8698441/v1), 2026-02-09
Supplement: Supplementary file 1 [file 2e335fef5651519e446a9ca5.docx]

**Supplemental table 1.** Maternal and neonatal characteristics of participating and non-participating children at five years, among survivors at 5, n=3609.

|  | **Included population analysis with complete assessment at 5 years (n=2157)** | **Non-participating at 5 years (n=1090) or incomplete assessment (n=362)** |  |
| --- | --- | --- | --- |
|  | **n/N (%)** | **n/N (%)** | **p-value** |
| **Exposition** |  |  |  |
| **Maternal autoimmune diseases** | 93/2157 (5.5) | 62/1452 (5.3) | 0.89 |
| **Maternal characteristics at birth** |  |  |  |
| **Maternal age** |  |  |  |
| <25 years | 284/2157 (11.4) | 324/1452 (20.9) | 0.001 |
| 25-34 years | 1375/2157 (64.4) | 812/1452 (59.0) |  |
| >35 years | 498/2157 (24.3) | 316/1452 (20.2) |  |
| **Primiparous** | 1233/2141 (56.8) | 731/1432 (52.3) | 0.084 |
| **Birth in France** | 1782/2155 (85.1) | 1024/1422 (74.5) | <0.001 |
| **Level of education** |  |  |  |
| Less than high school | 186/2094 (8.3) | 219/1251 (16.5) | <0.001 |
| High school | 762/2094 (36.5) | 580/1251 (45.5) |  |
| 1-2 years of graduate studies | 518/2094 (24.0) | 218/1251 (17.5) |  |
| 3+ years of graduate studies | 628/2094 (31.1) | 234/1251 (20.5) |  |
| **Parents’ socio-economic statusa** |  |  |  |
| Executive | 540/2076 (27.3) | 225/1351 (17.4) | <0.001 |
| Intermediate | 521/2076 (25.8) | 209/1351 (16.6) |  |
| Administration | 546/2076 (25.6) | 407/1351 (30.3) |  |
| Service, trade | 235/2076 (11.2) | 242/1351 (17.3) |  |
| Worker, unemployed | 234/2076 (10.0) | 268/1351 (18.4) |  |
| **Tobacco use during pregnancy** | 380/2096 (16.6) | 356/1406 (25.7) | <0.001 |
| **Maternal obstetrical characteristics** |  |  |  |
| **Gestational diabetes** | 179/2015 (10.0) | 108/1339 (9.3) | 0.68 |
| **Hypertension during pregnancy** | 391/2030 (16.3) | 245/1346 (16.5) | 0.89 |
| **Preeclampsia** | 436/2111 (16.2) | 261/1423 (15.9) | 0.84 |
| **Placental abruption** | 97/2116 (3.0) | 65/1409 (4.2) | 0.11 |
| **Cause of preterm birth** |  |  |  |
| Preterm labor group | 867/2157 (42.9) | 589/1452 (44.5) | 0.57 |
| Preterm premature rupture of membranes | 393/2157 (18.9) | 281/1452 (19.7) |  |
| Hypertensive disorders or Placental abruption | 562/2157 (21.4) | 334/1452 (19.7) |  |
| Isolated fetal growth restriction | 150/2157 (6.2) | 108/1452 (7.4) |  |
| Other | 185/2157 (10.6) | 140/1452 (8.7) |  |
| **Multiple pregnancy** | 757/2157 (37.7) | 482/1452 (33.9) | 0.17 |
| **Neonatal characteristics** |  |  |  |
| **Gestational age groups (weeks)** |  |  |  |
| 23-26 | 200/2157 (3.2) | 124/1452 (2.7) | 0.006 |
| 27-31 | 1350/2157 (29.0) | 846/1452 (24.6) |  |
| 32-34 | 607/2157 (67.8) | 482/1452 (72.8) |  |
| **Sex male** | 1159/2157 (55.6) | 751/1452 (50.2) | 0.07 |
| **Small for gestational age** b | 830/2157 (35.6) | 521/1451 (33.6) | 0.37 |
| **Severe neonatal morbidities** | 254/2058 (6.6) | 154/1357 (5.4) | 0.13 |

Data are No./total (%), unless otherwise indicated. Denominators vary according to the number of missing data for each variable. Percentages are weighted to consider the differences in survey design between gestational age groups.

**a** Defined as the highest occupational status between occupations of the mother and the father, or mother only if living alone.

b Small for GA was defined as birth weight less than the 10th percentile for gestational age and sex based on French intrauterine “EPOPé” growth curves

**Supplemental table 2.** Behavior and communication mean score outcome at 2 and 5 years according to maternal autoimmune disease exposure, among survivors at 5, n=3609.

|  | **Maternal autoimmune diseases** | |  | **Exposed vs Unexposed,** | | |
| --- | --- | --- | --- | --- | --- | --- |
|  | **Unexposed (n=3454)** | **Exposed (n=155)** |  | **mean difference (95% CI)** | **Adjusted mean difference (95% CI)a** | **Adjusted mean difference (95% CI)a, after multiple Imputation** |
|  | **mean (sd)** | **mean (sd)** | **p-value** |
| **At 2 years’ corrected age** |  |  |  |  |  |  |
| Total ASQ scoreb | 231.8 (45.3) | 228.6 (47.7) | 0.78 | -3.3 (-15.9 to 9.3) | -0.7 (-10.6 to 9.2) | 0.7 (-9.6 to 11.0) |
| By domainb, |  |  |  |  |  |  |
| Communication | 44.1 (16.1) | 43.1 (16.9) | 0.78 | -1.0 (-5.2 to 3.3) | -0.4 (-4.1 to 3.3) | -0.5 (-4.3 to 3.3) |
| Gross motor | 51.6 (11.0) | 50.8 (9.4) | 0.15 | -0.8 (-3.4 to 1.7) | 0.3 (-1.7 to 2.3) | 0.5 (-2.7 to 3.8) |
| Fine motor | 48.4 (9.4) | 48.9 (8.5) | 0.85 | 0.5 (-1.7 to 2.8) | 0.2 (-1.6 to 2.1) | 0.5 (-1.5 to 2.6) |
| Problem solving | 42.6 (12.0) | 42.2 (12.2) | 0.88 | -0.4 (-3.3 to 2.6) | 0.0 (-2.3 to 2.3) | 0.4 (-2.0 to 2.8) |
| Personal-social | 45.2 (11.4) | 44.0 (13.3) | 0.83 | -1.1 (-4.8 to 2.6) | -0.6 (-3.3 to 2.0) | -0.2 (-3.5 to 3.0) |
| **At 5 years of age** |  |  |  |  |  |  |
| **Behavioural difficulties** |  |  |  |  |  |  |
| **Total SDQ scorec** | 10.0 (5.6) | 8.9 (5.3) | 0.190 | -1.1 (-2.6 to 0.3) | -0.2 (-1.4 to 1.0) | 0.0 (-1.1 to 1.2) |
| By domain**c**, |  |  |  |  |  |  |
| Emotional symptoms | 2.5 (2.1) | 2.1 (2.2) | 0.11 | -0.4 (-1.0 to 0.2) | -0.1 (-0.5 to 0.4) | 0.0 (-0.5 to 0.4) |
| Conduct problems | 2.1 (1.6) | 1.8 (1.6) | 0.17 | -0.3 (-0.8 to 0.1) | -0.2 (-0.5 to 0.1) | -0.1 (-0.4 to 0.2) |
| Hyperactivity | 3.9 (2.7) | 3.8 (2.6) | 0.81 | -0.1 (-0.7 to 0.5) | 0.2 (-0.3 to 0.8) | 0.2 (-0.3 to 0.7) |
| Peer problems | 1.4 (1.6) | 1.1 (1.5) | 0.11 | -0.3 (-0.7 to 0.1) | -0.2 (-0.5 to 0.2) | 0.0 (-0.4 to 0.3) |
| **Social communication difficulties** |  |  |  |  |  |  |
| Total SCQ score**c** | 5.6 (3.7) | 4.5 (3.2) | 0.039 | -1.0 (-1.8 to -0.3) | 0.1 (-0.7 to 0.9) | 0.0 (-0.7 to 0.8) |
| By domain**c**, |  |  |  |  |  |  |
| Reciprocal Social Interaction | 1.1 (1.3) | 0.8 (1.1) | 0.033 | -0.3 (-0.6 to -0.1) | 0.0 (-0.2 to 0.3) | 0.0 (-0.3 to 0.3) |
| Communication | 2.4 (1.8) | 2.3 (1.7) | 0.66 | -0.1 (-0.6 to 0.4) | 0.1 (-0.4 to 0.5) | 0.0 (-0.3 to 0.4) |
| Restricted, Repetitive, and  Stereotyped Patterns of Behavior | 1.8 (1.9) | 1.3 (1.8) | 0.033 | -0.5 (-1.0 to 0.0) | 0.0 (-0.4 to 0.5) | 0.0 (-0.4 to 0.5) |

Data are No./total (weighted %), unless otherwise indicated. Denominators vary according to the number of missing data for each variable. Mean are weighted to consider the differences in survey design between gestational age groups.

Abbreviations: ASQ, Ages & Stages Questionnaire; M-CHAT, Modified Checklist for Autism in Toddlers; SCQ, Social Communication Questionnaire; SDQ, Strengths and difficulties questionnaire.

a Logistic regression analysis with cluster robust variance estimates to account for non-independence of twins, adjusted on maternal age, primiparity, maternal birth in France, maternal level of education, parents’ socio-economic status, tobacco use during pregnancy, gestational age and child sex. b Higher scores correspond to better development assessment. c Higher scores correspond to more difficulties.

**Supplemental figure 1.** Covariable balance in the propensity score-matched sample.


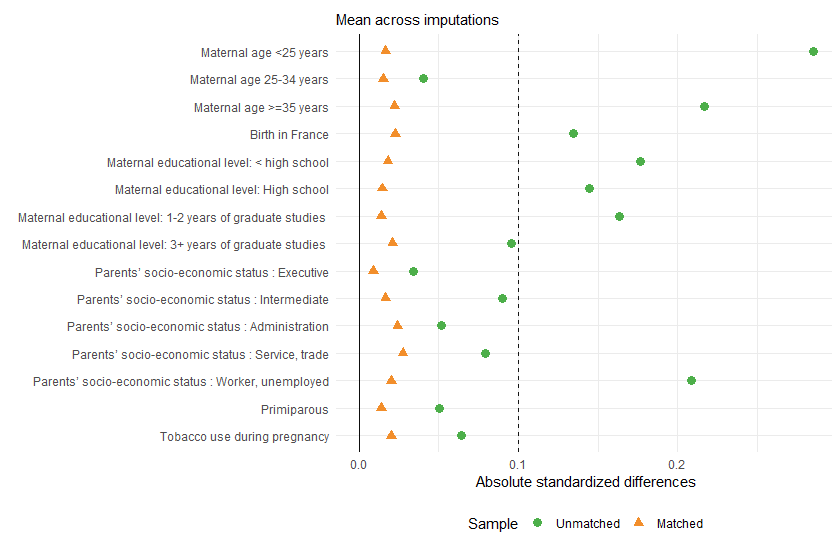


Each point illustrates the standardized difference for each variable in the full sample (green circle) and the propensity score-matched sample (orange triangle). The vertical dotted line at 10% illustrates the standard cut-off for acceptable imbalance between groups. 155 children in exposed group are matched to 155 non-exposed.

**Supplemental table 3.** Behavior and communication outcome at 2 and 5 years according to maternal autoimmune disease exposure for children without maternal immunosuppressive therapy, n=3498.

|  | **Without immunosuppressive therapy** |
| --- | --- |
|  | **Exposed vs Unexposed** |
|  | **aOR (95% CI), after multiple Imputation** |
| **At 2 years’ corrected age** |  |
| **Global developmental delay (ASQ score** a**)** | 0.99 (0.66 to 1.50) |
| By domain, |  |
| Communication | 1.11 (0.64 to 1.93) |
| Gross motor | 0.91 (0.47 to 1.74) |
| Fine motor | 0.85 (0.45 to 1.60) |
| Problem solving | 0.87 (0.49 to 1.55) |
| Personal-social | 1.49 (0.81 to 2.74) |
| **Autistic traits (M-CHAT** b**)** | 0.61 (0.34 to 1.09) |
| **At 5.5 years of age** |  |
| **Behavioural difficulties** |  |
| **Total SDQ score >90th percentile** c | 0.93 (0.44 to 1.96) |
| By domain, |  |
| Emotional symptoms | 0.99 (0.58 to 1.69) |
| Conduct problems | 0.82 (0.45 to 1.47) |
| Hyperactivity | 1.28 (0.78 to 2.08) |
| Peer problems | 0.90 (0.48 to 1.70) |
| **Social communication difficulties** d | 0.95 (0.48 to 1.86) |

Logistic regression analysis with cluster robust variance estimates to account for non-independence of twins, adjusted on maternal age, primiparity, maternal birth in France, maternal level of education, parents’ socio-economic status, tobacco use during pregnancy, and gestational age. Result after multiple imputation.

Abbreviations: ASQ, Ages & Stages Questionnaire; M-CHAT, Modified Checklist for Autism in Toddlers; SCQ, Social Communication Questionnaire; SDQ, Strengths and difficulties questionnaire.

a Risk of developmental delay is defined by an ASQ score < 2 SDs from the mean in any of the five ASQ domains.

b Positive M-CHAT is defined by at least 3 of the 23 items failed.

c Cut-off > 90th percentile of the reference group of term-born children, corresponds to SDQ score ≥ 19.

d Defined by total SCQ score > 90th percentile of the reference group of term-born children, corresponds to SCQ score ≥ 11.
